# Supplementary material for: Autologous humanized mouse models to study combination and single-agent immunotherapy for colorectal cancer patient-derived xenografts
Source: Frontiers journal article supplement (doi:10.3389/fonc.2022.994333), 2022-09-21
Supplement: Data_Sheet_1.pdf [file Data_Sheet_1.pdf]

## Supplemental Data

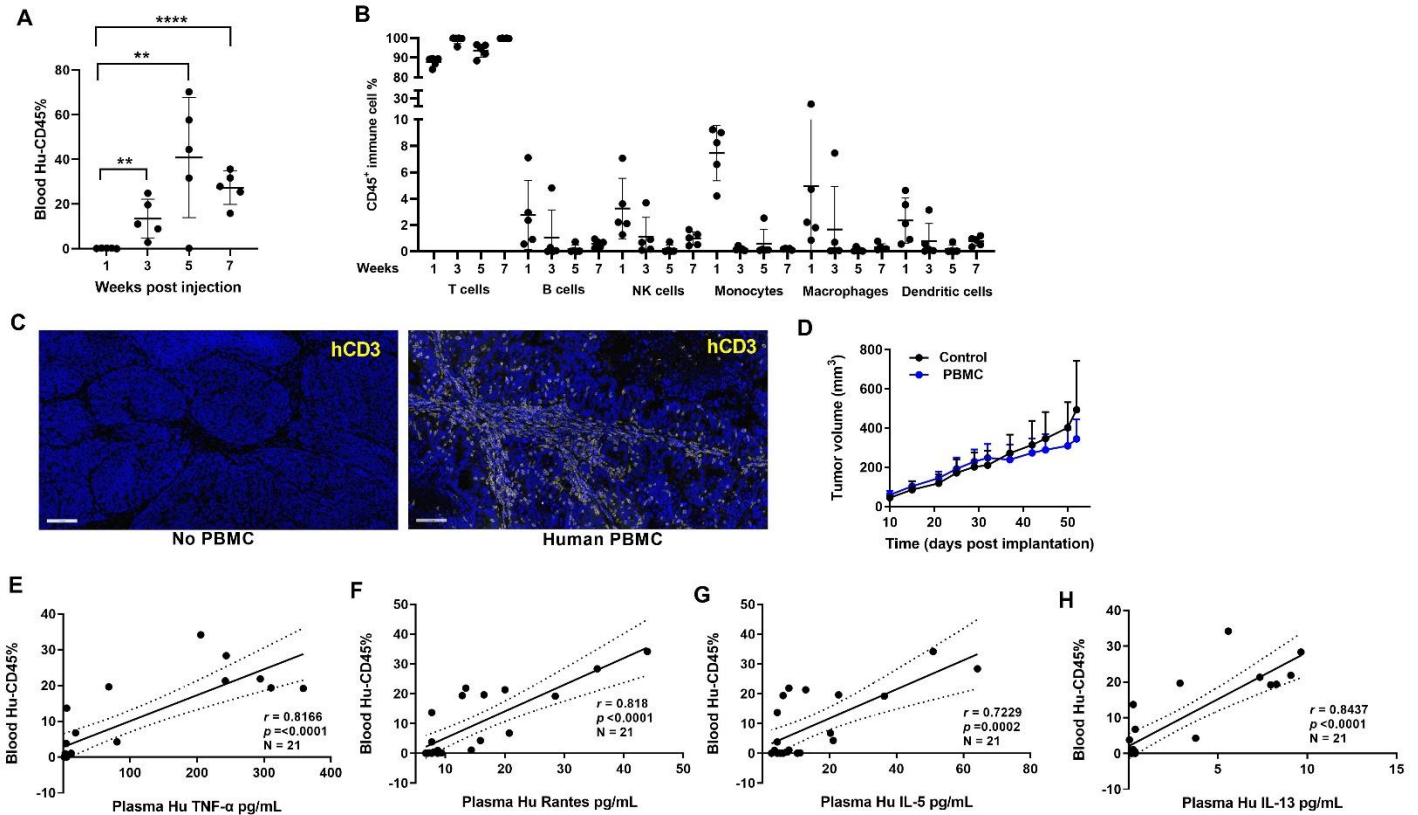

### Supplemental Figure 1. Humanized mouse characteristics

(A) Changes in hCD45<sup>+</sup> immune cells over time (week 1 through week 7 post PBMC injection) in mouse blood. (B) Changes in sub populations of hCD45<sup>+</sup> immune cell subtypes over time in mouse blood. (C) hCD3<sup>+</sup> staining in a nonhumanized mouse PDX (left) and a humanized mouse PDX (right). (D) PDX growth curves for mice with and without injection of human PBMCs. (E-H) Correlation of the hCD45<sup>+</sup> cell percentage in mouse blood with human tumor necrosis factor (TNF)-α (E), Rantes (F), interleukin (IL)-5 (G), and IL-13 (H) level in mouse plasma. *P* values ≤ 0.01 were represented as \*\* and *P* values ≤ 0.0001 were represented as \*\*\*\*.

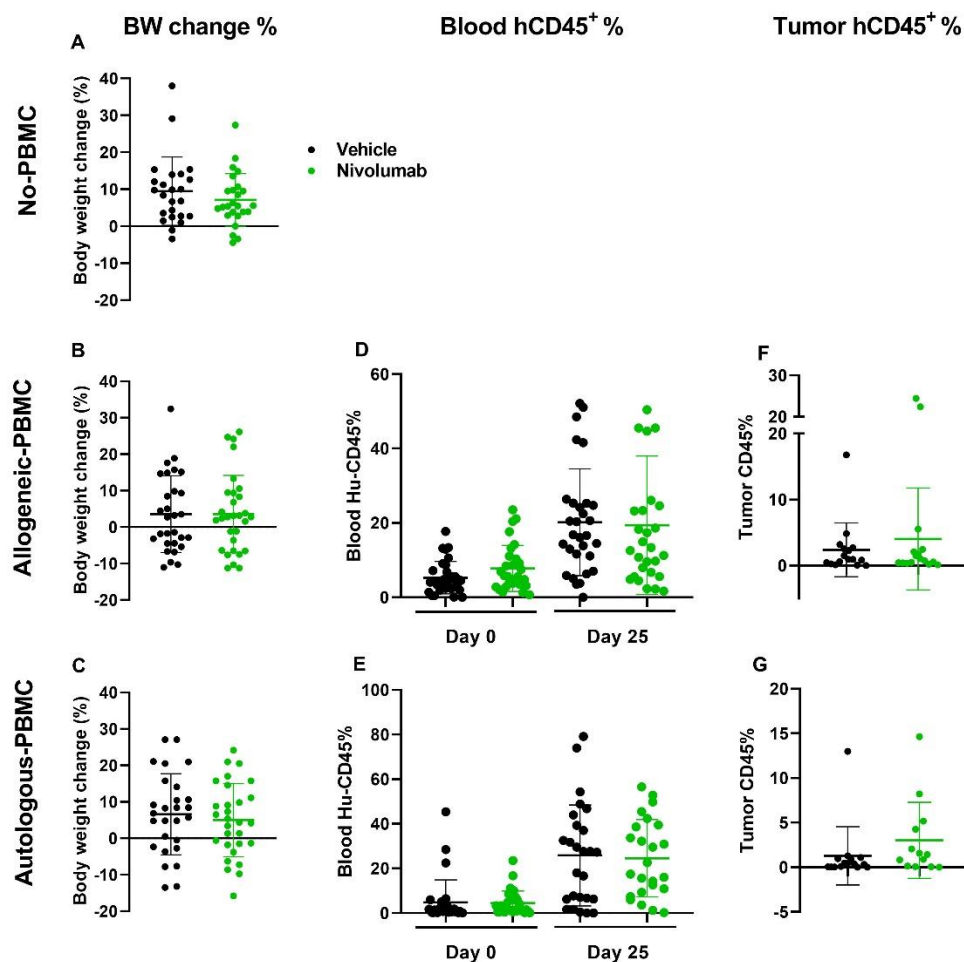

**Supplemental Figure 2. Body weight changes and human immune cell percentage in blood and tumors of mice**

(A, B, and C) Body-weight changes in mice under non-humanized (A), allogeneic (B), and autologous (C) conditions. (D and E) hCD45<sup>+</sup> cell percentages in peripheral blood before and after treatment under allogeneic (D) and autologous (E) conditions. (F and G) Tumor immune infiltrates after anti-PD-1 therapy under allogeneic (F) and autologous (G) conditions.

## B8120

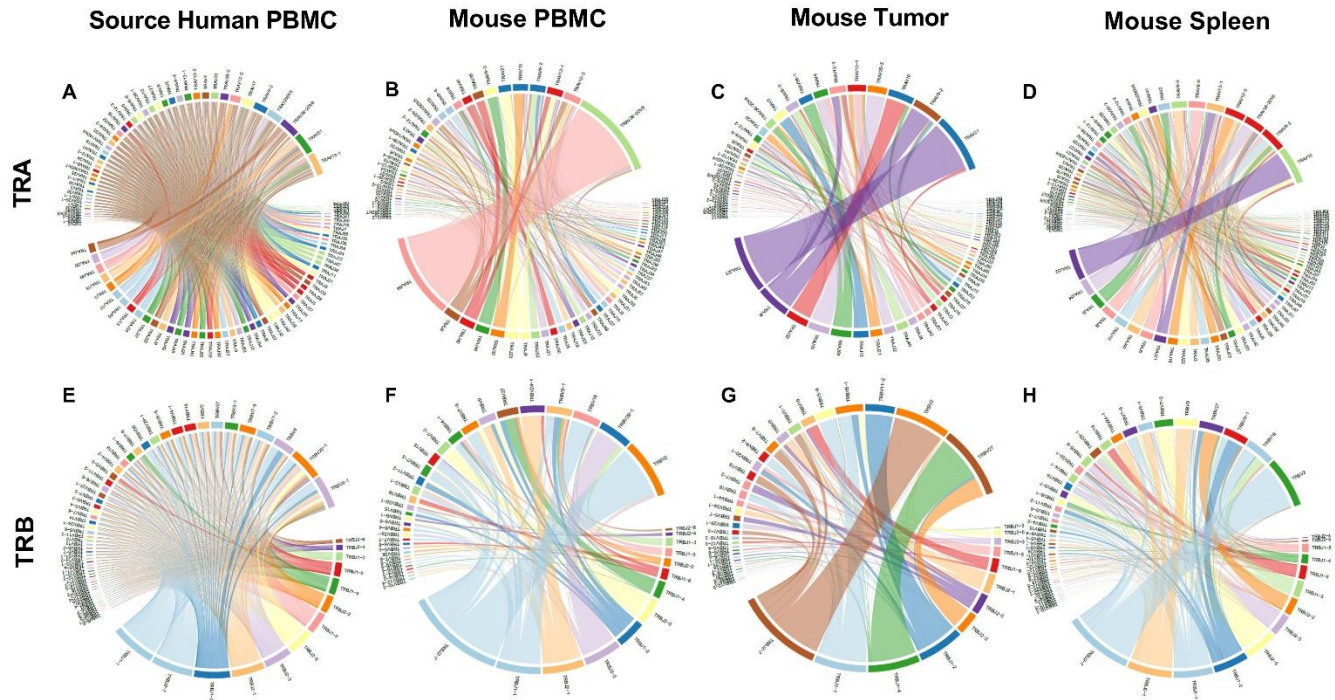

## B8176

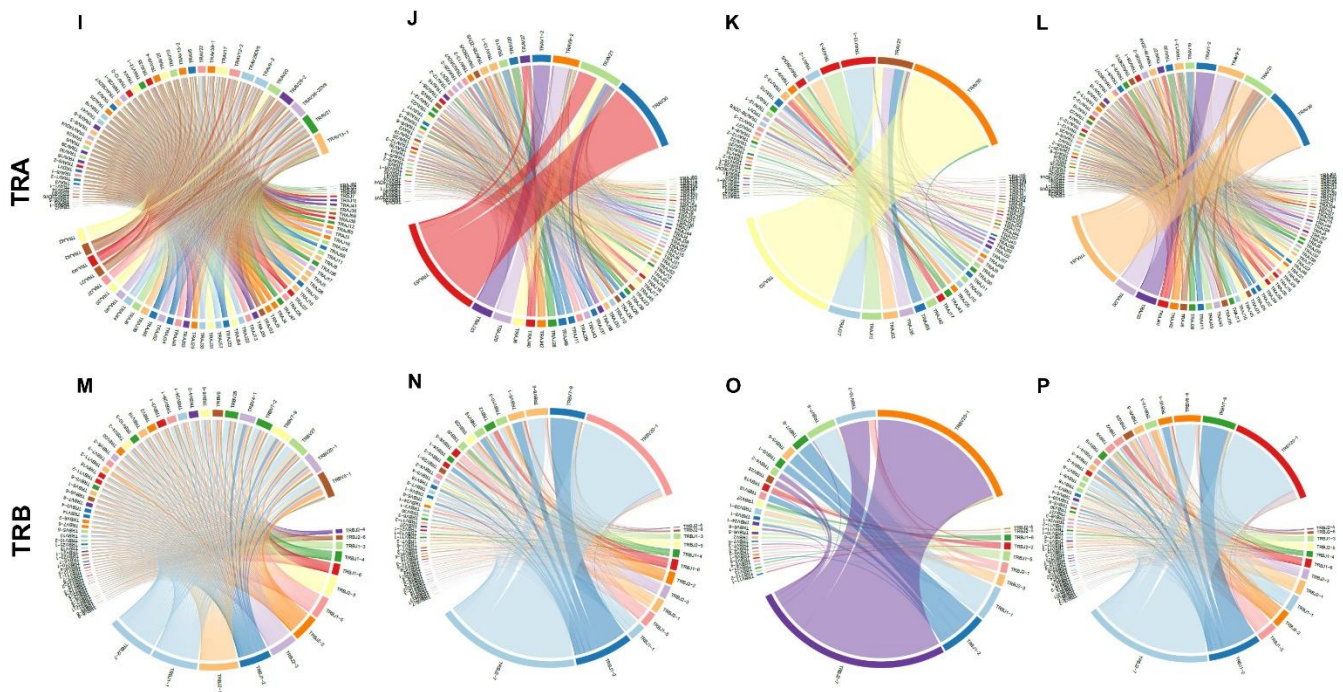

### Supplemental Figure 3. Circus plots of clonal rearrangement patterns

(A-D) The rearrangement patterns for the TCR chains within the TRA clones in model B8120. (E-H) The rearrangement patterns for the TCR chains within the TRB clones in model B8120. (I-L) The rearrangement patterns for the TCR chains within the TRA clones in model B8176. (M-P) The rearrangement patterns for the TCR chains within the TRB clones in model B8176.



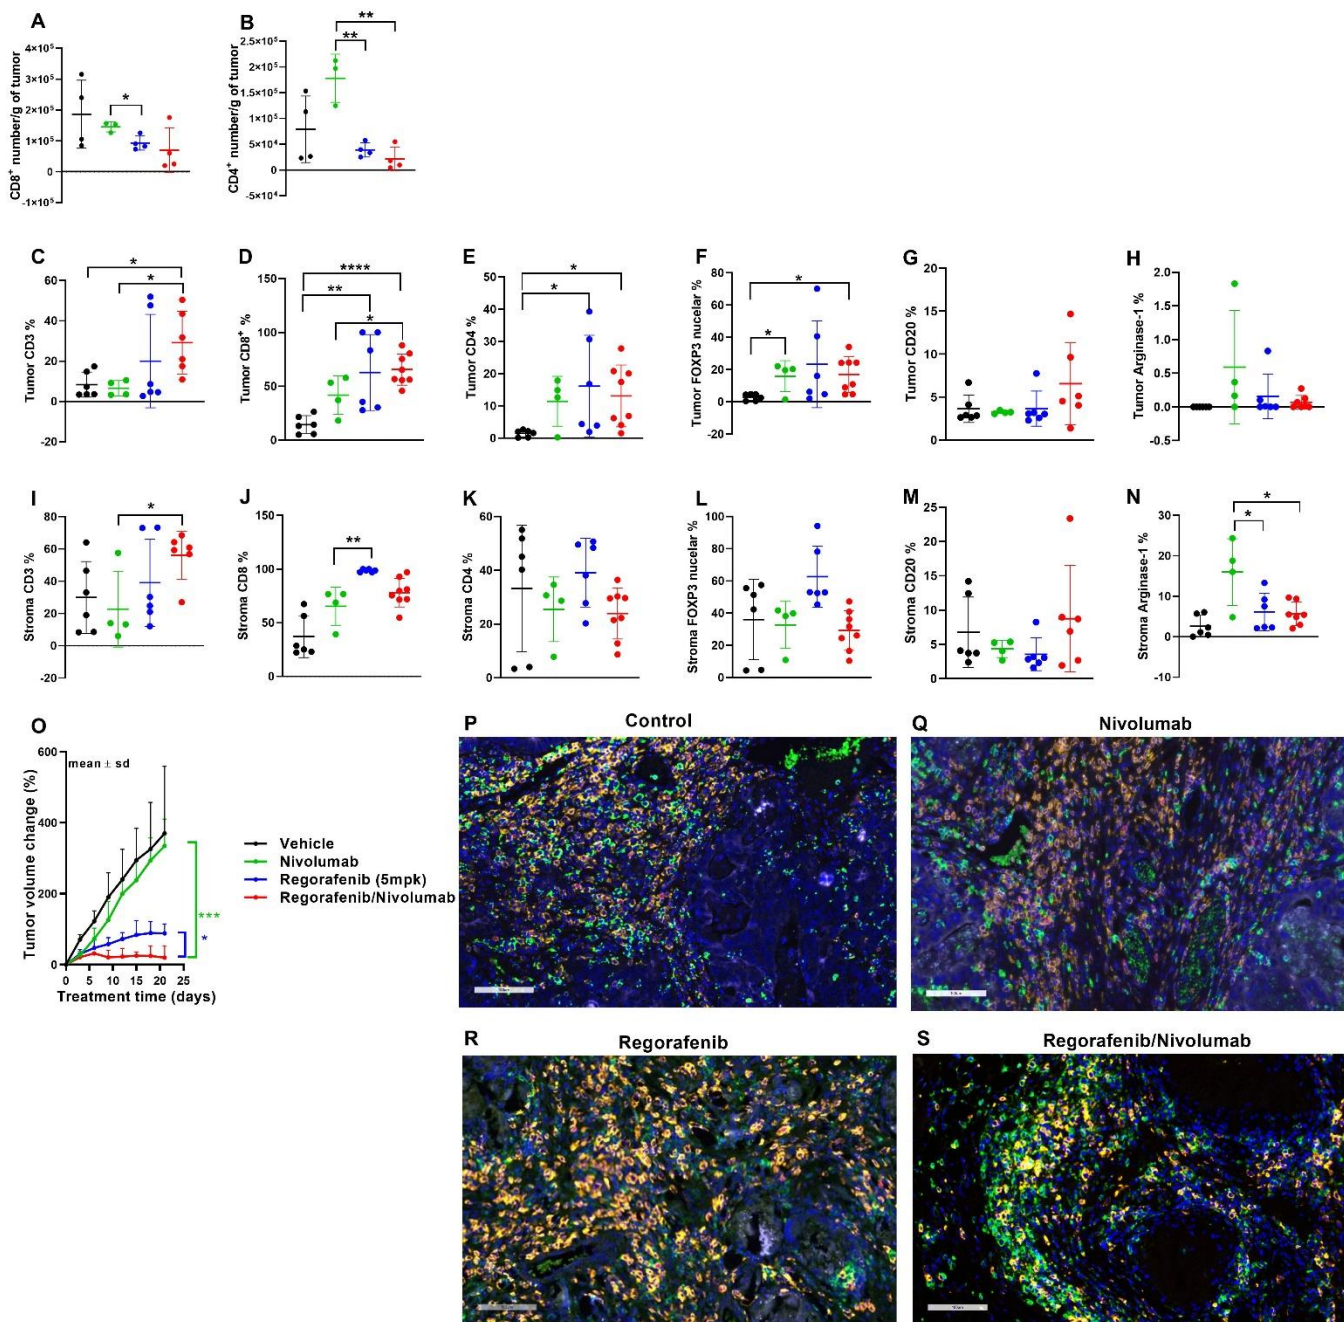

**Supplemental Figure 4. Results of anti-PD-1 and regorafenib combination therapy for MSS CRC model** (A and B) CD8<sup>+</sup> (A) and CD4<sup>+</sup> (B) T-cell numbers per gram of tumor weight. (C-F) Cell percentage distributions within the intratumoral compartments. (I-L) Cell percentage distributions within the stromal compartments. (G and M) CD20<sup>+</sup> B-cell distributions within the intratumoral (G) and stromal (M) compartments. (H and N) Arginase-1<sup>+</sup> macrophage distribution within the intratumoral (H) and stromal (N) compartments. (O) The effect of the combination of anti-PD-1 therapy and a reduced regorafenib dose on tumor volume change in the C1211 MSS CRC PDX model. (P-S) Multiplex immunofluorescence representative images of control (P), nivolumab (Q), regorafenib (R), and regorafenib+nivolumab (S) treated tumors showing staining for CD8 (green), CD4 (gold), FOXP3 (red), TUMOR (periwinkle/white). All *P* values ≤ 0.05 were represented as \*, *P* values ≤ 0.01 were represented as \*\*, *P* values ≤ 0.001 were represented as \*\*\*, and *P* values ≤ 0.0001 were represented as \*\*\*\*.

**Supplemental Table 1A: Flow cytometry antibodies**

| Antibody target | Conjugate    | Clone   | Company        |
|-----------------|--------------|---------|----------------|
| CD45            | PerCP        | 30-F11  | BD Biosciences |
| CD45            | APC          | HI30    | BD Biosciences |
| CD3             | PE           | UCHT1   | BD Biosciences |
| CD4             | Alexa 700    | RPA-T4  | BD Biosciences |
| CD8             | PE-Cy™7      | RPA-T8  | BD Biosciences |
| FoxP3           | Horizon V450 | 259D/C7 | BD Biosciences |
| CD56            | BB700        | B159    | BD Biosciences |
| CD56            | Horizon V450 | B159    | BD Biosciences |
| CD19            | FITC         | HIB19   | BD Biosciences |
| CD15            | PerCP-Cy5.5  | HI98    | BD Biosciences |
| CD14            | PE-Cy7       | MphiP9  | BD Biosciences |
| CD11b/Mac-1     | APC-Cy7      | ICRF44  | BD Biosciences |
| CD209           | PE           | DCN46   | BD Biosciences |
| CD163           | PE-CF594     | GHI/61  | BD Biosciences |

**Supplemental Table 1B: mIF antibodies**

| Antibody target  | Panel                        | Clone      | Company                     |
|------------------|------------------------------|------------|-----------------------------|
| Cleaved caspase3 | Tumor microenvironment panel | 40714      | Biocare                     |
| Ki-67            | Tumor microenvironment panel | SP6        | Abcam                       |
| Vimentin         | Tumor microenvironment panel | D21H3      | Cell Signaling Technologies |
| Pan Cytokeratin  | Tumor microenvironment panel | 1712R      | Bioss                       |
| CD8              | T cell panel                 | NBP2-29475 | Novus                       |
| CD4              | T cell panel                 | BSB5151    | BioSB                       |
| FoxP3            | T cell panel                 | 98377      | Cell Signaling Technologies |
| Arginase-1       | Macrophage panel             | PA5-85267  | ThermoFisher                |
| CD163            | Macrophage panel             | EPR19518   | Abcam                       |
| IBA-1            | Macrophage panel             | EPR16589   | Abcam                       |
| Ku80             | Macrophage panel             | 2180       | Cell Signaling Technologies |

**Supplemental Table 2. TCR sequencing data** (excel sheet attached separately)**Supplemental Table 3. CRC PDX model details** (excel sheet attached separately)
